# Supplementary material for: Liquid phase deposition of titania onto nanostructured poly-p-xylylene thin films
Source: Royal Society of Chemistry journal article supplement (doi:10.1039/b902882j), 2009-01-01
Supplement: b902882j.pdf [file b902882j.pdf]

## SUPPLEMENTARY MATERIAL

### Liquid Phase Deposition of Titania onto Nanostructured Poly-*p*-xylylene Thin Films

Niranjan Malvadkar<sup>1</sup>, Walter J. Dressick<sup>2\*</sup>, and Melik C. Demirel<sup>1\*</sup>

<sup>1</sup>Materials Research Institute and Engineering Science, College of Engineering,

The Pennsylvania State University, University Park, PA 16802

<sup>2</sup>Naval Research Laboratory, Code 6910, 4555 Overlook Avenue, S.W., Washington, DC 20375

---

\*Corresponding Authors: Prof. Dr. Melik Demirel, E-mail: [mdemirel@engr.psu.edu](mailto:mdemirel@engr.psu.edu) or Dr.  
Walter J. Dressick, E-mail: [walter.dressick@nrl.navy.mil](mailto:walter.dressick@nrl.navy.mil)

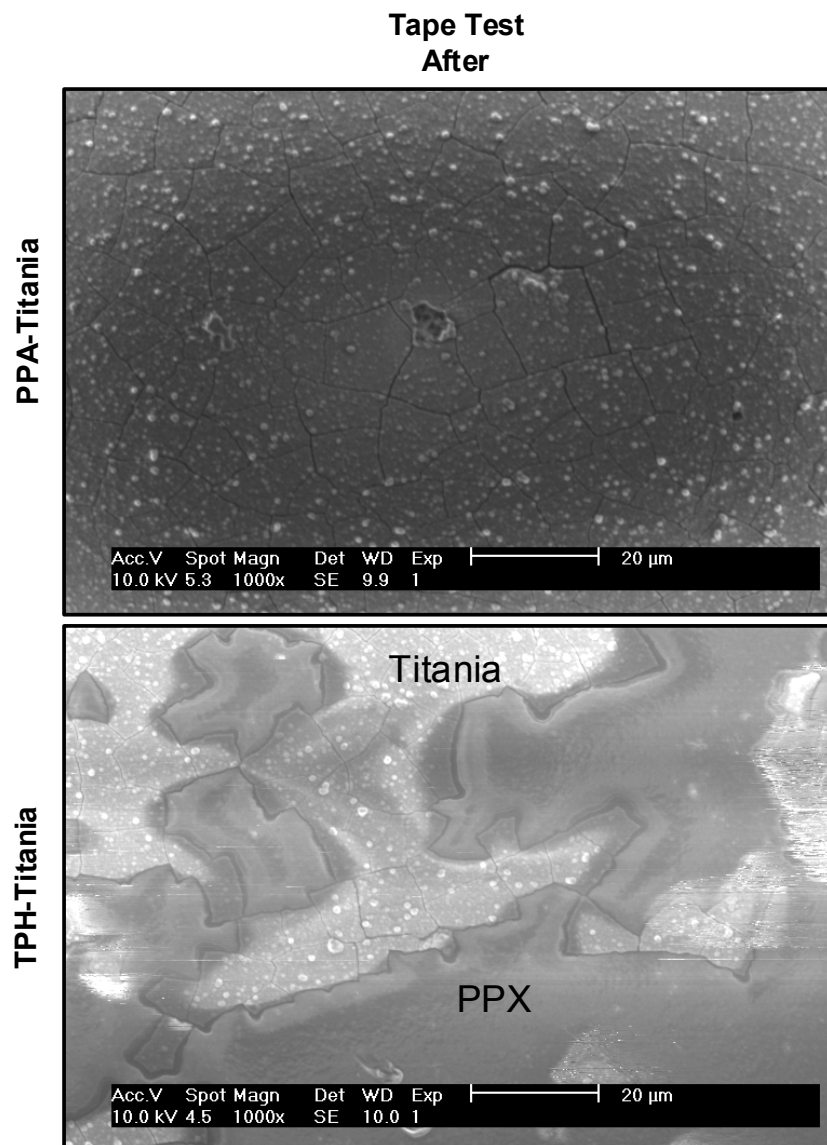

**Figure S-1:** Titania adhesion tape test results at low resolution SEMs are shown for titania films deposited onto nanostructured PPX-Cl films bearing PPA or TPH ligand after tape removal.

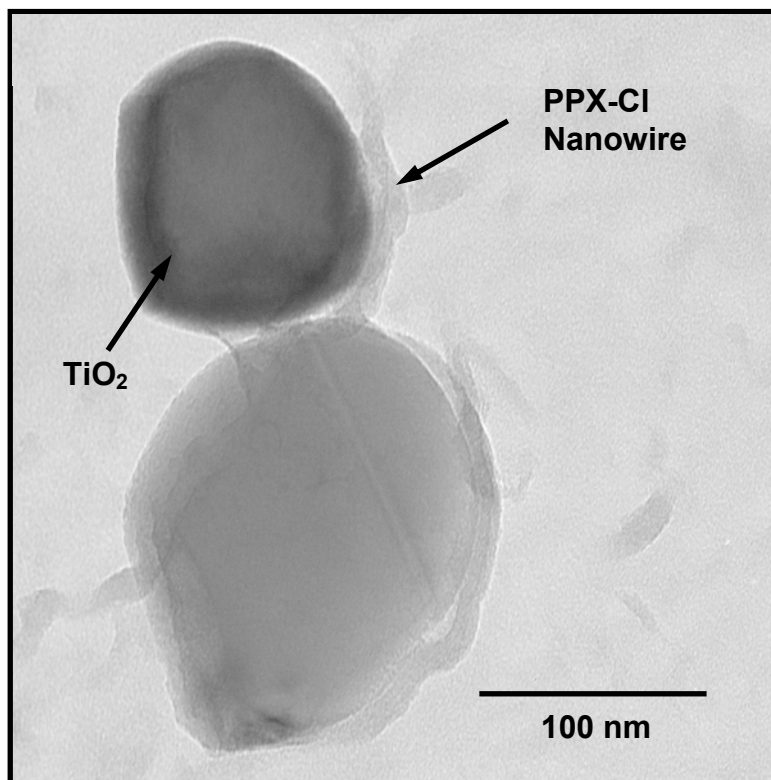

**Figure S-2:** the TEM image of titania nanoparticles stabilized on PPA treated nanostructured PPX-CI film (LPD titania bath time = 24 h).

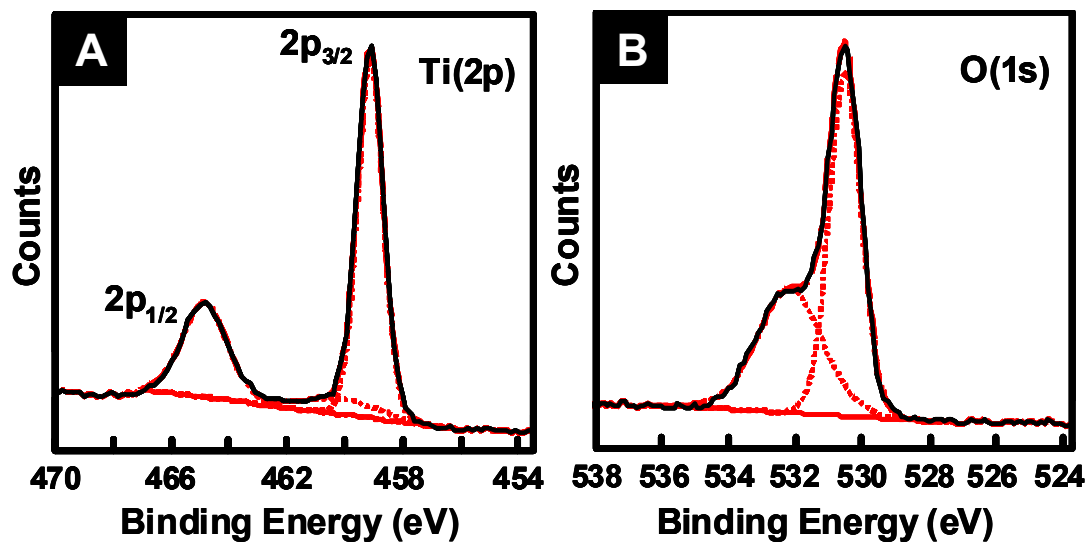

**Figure S-3:** XPS analysis of TPH-treated PPX-Cl film after 24 h titania deposition. (A) Ti(2p); (B) O(1s). Key: Black line = XPS spectrum; Red line = baseline; Red dotted line = deconvoluted XPS peaks; Red dashed line = fitted XPS spectrum.
